# Supplementary material for: A simple one-step extraction method for the determination of organophosphorus pesticides in shuanghuanglian and antivirus oral liquids by gas chromatography-tandem mass spectrometry
Source: Royal Society of Chemistry journal article supplement (doi:10.1039/c5ay01519g), 2015-01-01

## Supporting Information

### **A simple one-step extraction method for the determination of organophosphorus pesticides in shuanghuanglian and antivirus oral liquid by gas chromatography-tandem mass spectrometry**

Bin Wang,<sup>b</sup> Yao Zhong,<sup>b</sup> Xuejin Mao,<sup>a\*</sup> and Yiqun Wan<sup>a,c\*</sup>

<sup>a</sup> State Key Laboratory of Food Science and Technology, Nanchang University, Nanchang 330047, People's Republic of China

<sup>b</sup> Pharmaceutical College of Nanchang University, Nanchang 330006, People's Republic of China

<sup>c</sup> Center of Analysis and Testing, Nanchang University, Nanchang 330047, People's Republic of China

**Corresponding author:** Prof. Yiqun Wan

**Postal address:** No. 235 Nanjing East Road, Nanchang 330047, Jiangxi, People's Republic of China

**Tel:** +86 791 88321370

**Fax:** +86 791 88321370

**E-mail:** yqwanoy@sina.com

**Corresponding author:** Xuejin Mao

**Postal address:** No. 235 Nanjing East Road, Nanchang 330047, Jiangxi, People's Republic of China

**Tel.:** +86 791 88304449-9-520

**Fax:** +86 791 88304400

**E-mail:** mxjxwm2009@sina.com

**Fig. S1** The GC-MS/MS chromatogram of recovery experiment result carried out in spiked shuanghuanglian oral liquid (50 µg/L): standard mixture solution in matrix (**a**); spiked shuanghuanglian oral liquid (**b**). Peak identification: 1. ethoprophos, 2. phorate, 3. diazinon, 4. parathion-methyl, 5. fenitrothion, 6. malathion, 7. fenthion, 8. parathion, 9. phenthoate, 10. methidathion, 11. ethion.

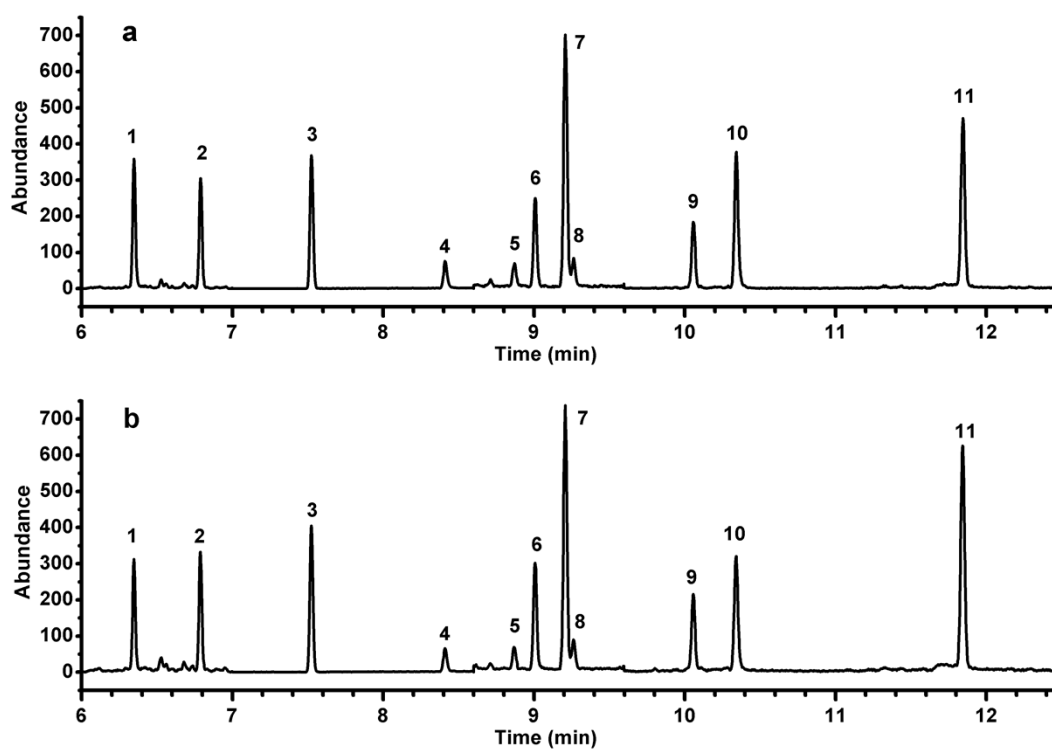

**Fig. S2** The GC-MS/MS chromatogram of recovery experiment result carried out in spiked antivirus oral liquid (50 µg/L): standard mixture solution in matrix (**a**); spiked antivirus oral liquid (**b**). Peak identification: 1. ethoprophos, 2. phorate, 3. diazinon, 4. parathion-methyl, 5. fenitrothion, 6. malathion, 7. fenthion, 8. parathion, 9. phenthoate, 10. methidathion, 11. ethion.

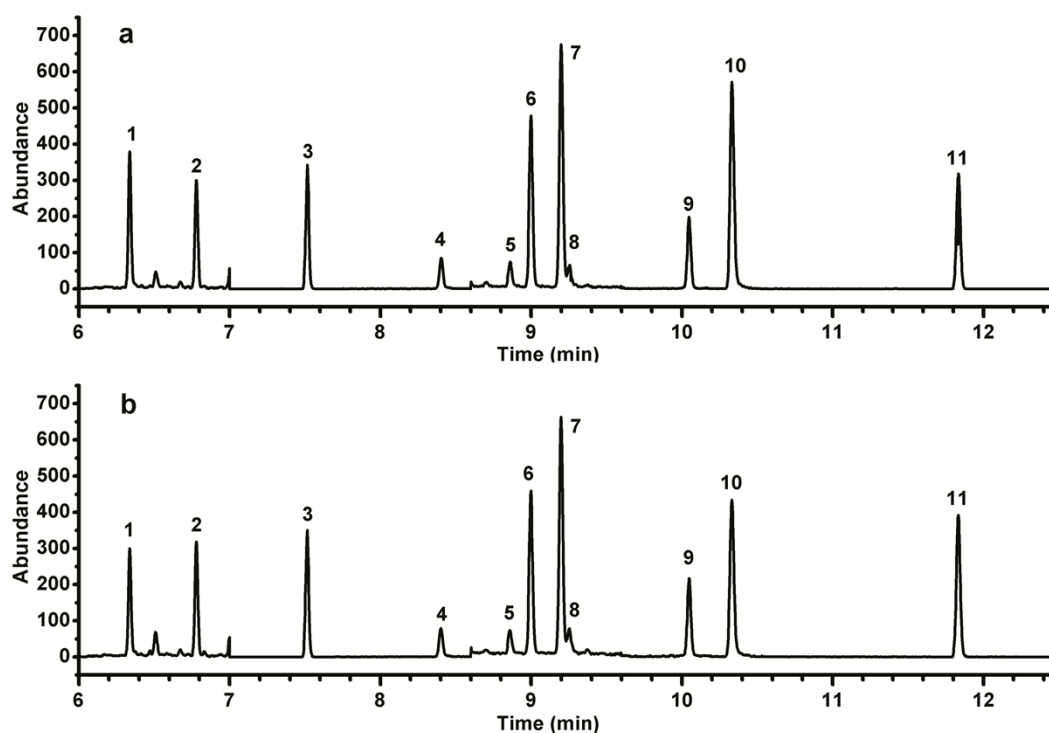

Supplement: c5ay01519g1.pdf [file c5ay01519g1.pdf]
